# Supplementary material
Source: PubMed Central journal article supplement (PMC7294712)
Supplement: ml0c00095_si_001.pdf [file ml0c00095_si_001.pdf]

## SUPPORTING INFORMATION

### **Discovery of an Atropisomeric PI3K $\beta$ Selective Inhibitor Through Optimization of the Hinge**

#### **Binding Motif**

Stephane Perreault,<sup>\*,1</sup> Fatima Arjmand,<sup>2</sup> Jayaraman Chandrasekhar,<sup>1</sup> Jia Hao,<sup>1</sup> Kathleen S. Keegan,<sup>1</sup> David Koditek,<sup>2</sup> Eve-Irene Lepist,<sup>†</sup> Clinton K. Matson,<sup>1</sup> Mary E. McGrath,<sup>2</sup> Leena Patel,<sup>1</sup> Kassandra Sedillo,<sup>†</sup> Joseph Therrien,<sup>1</sup> Nicholas A. Till,<sup>†</sup> Adrian Tomkinson,<sup>2</sup> Jennifer Treiberg,<sup>1</sup> Yelena Zhrebina,<sup>2</sup> and Gary Phillips.<sup>1</sup>

<sup>1</sup>Gilead Sciences, Inc., 199 E Blaine Street, Seattle, Washington 98102, United States

<sup>2</sup>Gilead Sciences, Inc., 333 Lakeside Drive, Foster City, California 94404, United States

|                                                                  |     |
|------------------------------------------------------------------|-----|
| 1. Quinoline and benzimidazole SAR.....                          | S2  |
| 2. Representative synthesis (( <i>P</i> )- <b>14</b> ).....      | S3  |
| 3. Characterization of final compounds as racemates.....         | S7  |
| 4. PI3K biochemical assays.....                                  | S13 |
| 5. EC <sub>50</sub> (pAKT1), PI3K $\beta$ .....                  | S13 |
| 6. Hepatocyte stability assay.....                               | S13 |
| 7. Caco-2 permeability.....                                      | S14 |
| 8. Pharmacokinetics.....                                         | S15 |
| 9. Ocular assessment.....                                        | S16 |
| 10. Kinase selectivity profiles of ( <i>P</i> )- <b>14</b> ..... | S20 |

## 1. QUINOLINE AND BENZIMIDAZOLE SAR

**Table S1. Quinoline SAR.**

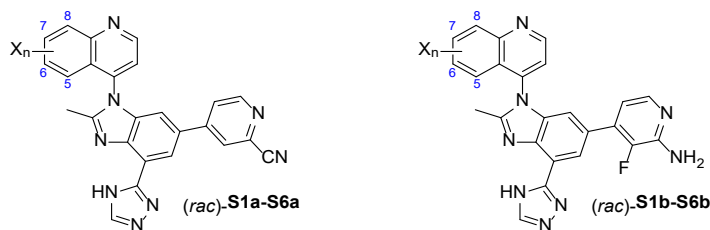

| X <sub>n</sub>    | Compound  | IC <sub>50</sub> (nM) <sup>a,b</sup> |               |               | Compound  | IC <sub>50</sub> (nM) <sup>a,b</sup> |               |               |
|-------------------|-----------|--------------------------------------|---------------|---------------|-----------|--------------------------------------|---------------|---------------|
|                   |           | PI3K $\beta$                         | PI3K $\alpha$ | PI3K $\delta$ |           | PI3K $\beta$                         | PI3K $\alpha$ | PI3K $\delta$ |
| 5,8-difluoro      | (rac)-14  | 4                                    | 48 (120x)     | 220 (55x)     | (rac)-19  | 3                                    | 260 (87x)     | 43 (14x)      |
| 5,7-difluoro      | (rac)-S1a | 5.9                                  | 7940 (134x)   | 120 (21x)     | (rac)-S1b | 7.0                                  | 550 (79x)     | 68 (10x)      |
| 5-fluoro          | (rac)-S2a | 4.6                                  | 400 (87x)     | 120 (26x)     | (rac)-S2b | 4.7                                  | 220 (48x)     | 47 (10x)      |
| 5-chloro          | (rac)-S3a | 198                                  | 1200 (6x)     | 1100 (5x)     | --        | --                                   | --            | --            |
| 8-chloro-5-fluoro | (rac)-S4a | 7.0                                  | 75 (11x)      | 20 (3x)       | (rac)-S4b | 3.0                                  | 30 (10x)      | 5.0 (<2x)     |
| 5-chloro-8-fluoro | (rac)-S5a | 18                                   | 1450 (81x)    | 560 (30x)     | (rac)-S5b | 29                                   | 1600 (53x)    | 500 (17x)     |
| 5,8-dichloro      | (rac)-S6a | 2.8                                  | 280 (99x)     | 78 (28x)      | (rac)-S6b | 6.4                                  | 430 (68x)     | 93 (15x)      |

<sup>a</sup>The activity against each class I PI3K was evaluated in in vitro kinase assays containing 2xK<sub>m</sub> steady state concentrations of ATP (average of  $\geq 2$  determinations). <sup>b</sup> Numbers in parentheses represent fold selectivity (PI3K $\alpha$ / $\delta/\gamma$  IC<sub>50</sub> divided by PI3K $\beta$  IC<sub>50</sub>).

**Table S2. Benzimidazole SAR.**

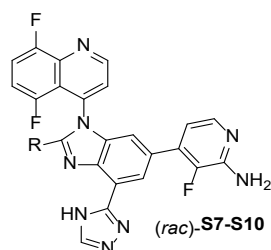

| R                                               | Compound  | IC <sub>50</sub> (nM) <sup>a</sup> |               |               |
|-------------------------------------------------|-----------|------------------------------------|---------------|---------------|
|                                                 |           | PI3K $\beta$                       | PI3K $\alpha$ | PI3K $\delta$ |
| CH <sub>2</sub> CH <sub>3</sub>                 | (rac)-S7  | 5                                  | 320 (64x)     | 110 (22x)     |
| (CH <sub>2</sub> ) <sub>2</sub> CH <sub>3</sub> | (rac)-S8  | 5                                  | 430 (86x)     | 70 (14x)      |
|                                                 | (rac)-S9  | 15                                 | 1100 (73x)    | 200 (13x)     |
|                                                 | (rac)-S10 | 7                                  | 420 (60x)     | 130 (26x)     |

<sup>a</sup>See footnotes of Table S1.

## 2. REPRESENTATIVE SYNTHESIS ((P)-14)

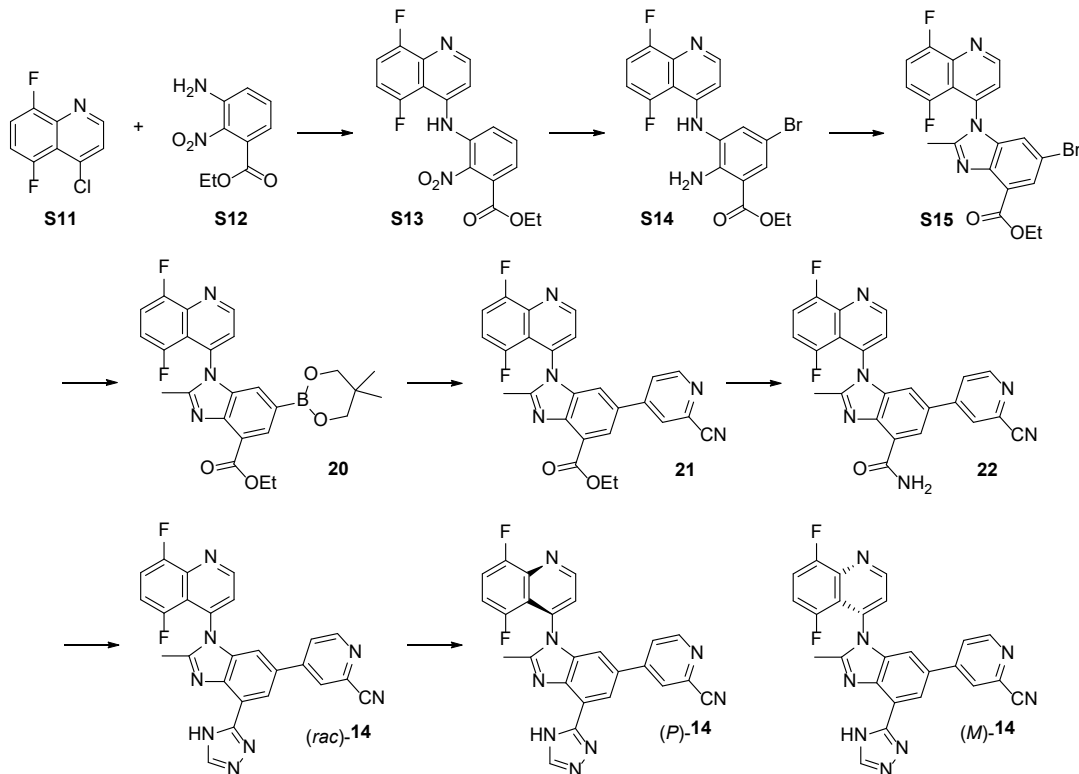

**General Procedures.** All commercial reagents and anhydrous solvents were used as provided without further purification. Flash chromatography was performed using an ISCO Combiflash or a Biotage Isolera purification system with Silicycle pre-packed silica gel cartridges. Final compounds were purified by prep HPLC on a Gilson 271 system, with a Phenomenex Kinetex C18 Column (250 mm x 30 mm, 100 Å, 5 μ) and a gradient elution of acetonitrile/water with, 5-95% for 20 mins at a flow rate of 35 mL/min. For all samples, 0.1% TFA was added to both eluents. All <sup>1</sup>H NMR spectra were recorded on a Varian 400-MR 400 MHz spectrometer. Proton chemical shifts are reported in parts per million from an internal standard or residual solvent. The purity of the tested compounds was assessed by an Agilent LCMS. A Silicycle Siliachrom SB C18 column (4.6 x 50 mm, 3 μ) was used with a gradient elution of acetonitrile in water, 0–95% for 7 min at a flow rate of 0.9 mL/min with detection at 256 nm. Alternatively, a Chromolith column (50 x 2 mm) was used with a gradient elution of acetonitrile in water, 0–95% for 3 min at a flow rate of 1.9 mL/min with detection at 256 nm wavelength. For all samples 0.1% TFA was added to both eluents. All final compounds were determined to be at least 95% pure by LC analysis.

**Ethyl 3-((5,8-difluoroquinolin-4-yl)amino)-2-nitrobenzoate (S13).** To a solution of 4-chloro-5,8-difluoroquinoline (S11) (171 g, 859.3 mmol) in DMF (1.7 L) at 0 °C were added ethyl 3-amino-2-nitrobenzoate (S12) (181.5 g, 859.3 mmol) and Cs<sub>2</sub>CO<sub>3</sub> (614.4 g, 1890 mmol). The reaction mixture was

stirred at 90 °C for 18 h. The reaction mixture was cooled down and filtered through a pad of Celite. The filtrate was partitioned between ethyl acetate and water. The organic phase was washed with brine, dried ( $\text{Na}_2\text{SO}_4$ ), filtered, and concentrated under reduced pressure. The crude product was purified by silica gel column chromatography, eluting with 30% ethyl acetate in petroleum ether to afford ethyl 3-((5,8-difluoroquinolin-4-yl)amino)-2-nitrobenzoate (**S13**) (158 g, 49%).  $m/z$  calcd for  $\text{C}_{18}\text{H}_{14}\text{F}_2\text{N}_3\text{O}_4$   $[\text{M}+\text{H}]^+$  374.1, found ESI MS  $m/z$  374.4  $[\text{M}+\text{H}]^+$ .

**Ethyl 2-amino-5-bromo-3-((5,8-difluoroquinolin-4-yl)amino)benzoate (S14).** To a solution of **S13** (158 g, 423.5 mmol) in AcOH (1.3 L) and MeOH (320 mL) at 0 °C was slowly added Zn dust (166 g, 2541 mmol) and the mixture was stirred at ambient temperature for 1 h. The reaction mixture was filtered through a pad of Celite and evaporated under reduced pressure. The resulting residue was suspended in DCM and washed sequentially with an aqueous saturated solution of  $\text{NaHCO}_3$  and brine. The organic layer was dried ( $\text{Na}_2\text{SO}_4$ ), filtered, and concentrated under reduced pressure to give ethyl 2-amino-3-((5,8-difluoroquinolin-4-yl)amino)benzoate (135 g, 93%).  $m/z$  calcd for  $\text{C}_{18}\text{H}_{16}\text{F}_2\text{N}_3\text{O}_2$   $[\text{M}+\text{H}]^+$  344.1, found ESI MS  $m/z$  344.0  $[\text{M}+\text{H}]^+$ .

To a solution of ethyl 2-amino-3-((5,8-difluoroquinolin-4-yl)amino)benzoate (135 g, 393 mmol) in DCM (2.7 L) at 0 °C was added bromine (30.4 mL, 1180 mmol) and the mixture was stirred at 0 °C for 1 h. The reaction mixture was quenched with aqueous  $\text{Na}_2\text{S}_2\text{O}_3$ , diluted with DCM and washed sequentially with an aqueous saturated solution of  $\text{NaHCO}_3$  and brine. The organic layer was dried ( $\text{Na}_2\text{SO}_4$ ), filtered, and concentrated under reduced pressure to give ethyl 2-amino-5-bromo-3-((5,8-difluoroquinolin-4-yl)amino)benzoate (**S14**) (103 g, 62%).  $m/z$  calcd for  $\text{C}_{18}\text{H}_{15}\text{BrF}_2\text{N}_3\text{O}_2$   $[\text{M}+\text{H}]^+$  422.0, found ESI MS  $m/z$  422.0  $[\text{M}+\text{H}]^+$ .

**Ethyl 6-bromo-1-(5,8-difluoroquinolin-4-yl)-2-methyl-1H-benzo[d]imidazole-4-carboxylate (S15).** A solution of **S15** (103 g, 244 mmol) in  $\text{Ac}_2\text{O}$  (515 mL) and AcOH (1 L) was refluxed for 18 h. The reaction mixture was concentrated under reduced pressure. The residue was diluted with ethyl acetate and washed sequentially with an aqueous saturated solution of  $\text{NaHCO}_3$  and brine. The organic layer was dried ( $\text{Na}_2\text{SO}_4$ ), filtered, and concentrated under reduced pressure. The crude compound was triturated with petroleum ether to give ethyl 6-bromo-1-(5,8-difluoroquinolin-4-yl)-2-methyl-1H-benzo[d]imidazole-4-carboxylate (**S15**) (68 g, 62%).  $m/z$  calcd for  $\text{C}_{20}\text{H}_{15}\text{BrF}_2\text{N}_3\text{O}_2$   $[\text{M}+\text{H}]^+$  446.0, found ESI MS  $m/z$  446.2  $[\text{M}+\text{H}]^+$ .

**Ethyl 1-(5,8-difluoroquinolin-4-yl)-6-(5,5-dimethyl-1,3,2-dioxaborinan-2-yl)-2-methyl-1H-benzo[d]imidazole-4-carboxylate (20).** [1,1'-Bis(diphenylphosphino)ferrocene]dichloropalladium(II) complex with dichloromethane (1.83 g, 2.24 mmol) was added to a solution of **S15** (10 g, 22.4 mmol),

bis(neopentyl glycolato)diboron (7.6 g, 33.6 mmol) and potassium acetate (5.5 g, 56.0 mmol) in dioxane (150 mL). Nitrogen was bubbled through the reaction mixture for 10 minutes and the reaction mixture was stirred at reflux for 24 h. The reaction mixture was cooled to ambient temperature and the solids were removed by filtration. The filtrate was dry-loaded onto silica gel and purified by silica gel column chromatography eluting with 25 to 100% ethyl acetate in hexane to afford ethyl 1-(5,8-difluoroquinolin-4-yl)-6-(5,5-dimethyl-1,3,2-dioxaborinan-2-yl)-2-methyl-1*H*-benzo[*d*]imidazole-4-carboxylate (**20**) (9.8 g, 91%). *m/z* calcd for C<sub>20</sub>H<sub>16</sub>BF<sub>2</sub>N<sub>3</sub>O<sub>4</sub> [M+H]<sup>+</sup> 412.1, found ESI MS *m/z* 412.3 [M+H]<sup>+</sup> (ArB(OH)<sub>2</sub>+H)<sup>+</sup>.

**Ethyl 6-(2-cyanopyridin-4-yl)-1-(5,8-difluoroquinolin-4-yl)-2-methyl-1*H*-benzo[*d*]imidazole-4-carboxylate (**21**).** Tetrakis(triphenylphosphine)palladium(0) (1.21 g, 1.04 mmol) was added to a solution of **20** (5.0 g, 10.4 mmol), 2-cyano-4-bromopyridine (2.29 g, 12.5 mmol), and potassium phosphate tribasic (5.54 g, 26.1 mmol) in dioxane (50 mL) and water (12 mL). Nitrogen was bubbled through the reaction mixture for 10 minutes and the reaction mixture was stirred at 70 °C for o/n. Upon cooling to ambient temperature, the reaction mixture was partitioned between ethyl acetate and water. The organic phase was washed with brine, dried with magnesium sulfate, filtered, and concentrated under reduced pressure to about 50 mL. The resulting suspension was stirred 2 h at room temperature and 1 h at 0 °C. The solid was filtered to afford ethyl 6-(2-cyanopyridin-4-yl)-1-(5,8-difluoroquinolin-4-yl)-2-methyl-1*H*-benzo[*d*]imidazole-4-carboxylate (**21**) (3.92 g, 80%). *m/z* calcd for C<sub>26</sub>H<sub>18</sub>F<sub>2</sub>N<sub>5</sub>O<sub>2</sub> [M+H]<sup>+</sup> 470.1, found ESI MS *m/z* 470.1 [M+H]<sup>+</sup>.

**6-(2-cyanopyridin-4-yl)-1-(5,8-difluoroquinolin-4-yl)-2-methyl-1*H*-benzo[*d*]imidazole-4-carboxamide (**22**).** Aqueous 1 M lithium hydroxide (25.6 mL) was added to **21** (8.03 g, 17.1 mmol) in THF (85 mL). The reaction was stirred at ambient temperature for 4 h. The reaction mixture was concentrated under reduced pressure to afford lithium 6-(2-cyanopyridin-4-yl)-1-(5,8-difluoroquinolin-4-yl)-2-methyl-1*H*-benzo[*d*]imidazole-4-carboxylate, which was used without further purification for the next step. *m/z* calcd for C<sub>24</sub>H<sub>14</sub>F<sub>2</sub>N<sub>5</sub>O<sub>2</sub> [M+H]<sup>+</sup> 442.1, found ESI MS *m/z* 442.1 [M+H]<sup>+</sup>.

To a solution of lithium 6-(2-cyanopyridin-4-yl)-1-(5,8-difluoroquinolin-4-yl)-2-methyl-1*H*-benzo[*d*]imidazole-4-carboxylate (17.1 mmol) in DMF (80 mL) were added ammonium chloride (5.49 g, 103 mmol), 1*H*-benzo[*d*][1,2,3]triazol-1-ol (7.07 g, 51.3 mmol), *N*1-((ethylimino)methylene)-*N*3,*N*3-dimethylpropane-1,3-diamine hydrochloride (9.83 g, 51.3 mmol) and diethylisopropylamine (24 mL, 137 mmol). The mixture was stirred at 45 °C for overnight. The material was precipitated by the addition of water. The resulting solid was isolated via filtration, washed with water, and dried under vacuum to afford 6-(2-cyanopyridin-4-yl)-1-(5,8-difluoroquinolin-4-yl)-2-methyl-1*H*-benzo[*d*]imidazole-4-carboxamide (**22**) (5.77 g, 77% over 2 steps). *m/z* calcd for C<sub>24</sub>H<sub>15</sub>F<sub>2</sub>N<sub>6</sub>O [M+H]<sup>+</sup> 441.1, found ESI MS *m/z* 441.1 [M+H]<sup>+</sup>.

**4-(1-(5,8-difluoroquinolin-4-yl)-2-methyl-4-(4H-1,2,4-triazol-3-yl)-1H-benzo[d]imidazol-6-yl)picolinonitrile ((*rac*)-14). 22** (5.77 g, 13.1 mmol) was suspended in 1,1-dimethoxy-N,N-dimethylmethanamine (87 mL, 655 mmol) and stirred at 110 °C for 16 h. The solution was cooled to ambient temperature, concentrated under reduced pressure, and dried under vacuum overnight. The resulting residue was brought up in acetic acid (80 mL) and added dropwise over 20 min into a solution of hydrazine (1.23 mL, 39.3 mmol) in AcOH (50 mL). The mixture was stirred at 65 °C for 30 minutes. The mixture was slowly cool down to room temperature and allowed to recrystallize for o/n. The solid was isolated via filtration. The crude product was purified by silica gel column chromatography, eluting with 0-15% (1% NH<sub>4</sub>OH in MeOH) in DCM to afford 4-(1-(5,8-difluoroquinolin-4-yl)-2-methyl-4-(4H-1,2,4-triazol-3-yl)-1H-benzo[d]imidazol-6-yl)picolinonitrile ((*rac*)-14) (4.10 g, 68%). *m/z* calcd for C<sub>25</sub>H<sub>15</sub>F<sub>2</sub>N<sub>8</sub> [M+H]<sup>+</sup> 465.1, found ESI MS *m/z* 465.1 [M+H]<sup>+</sup>.

**(*P*)-4-(1-(5,8-difluoroquinolin-4-yl)-2-methyl-4-(4H-1,2,4-triazol-3-yl)-1H-benzo[d]imidazol-6-yl)picolinonitrile ((*P*)-14) and (*M*)-4-(1-(5,8-difluoroquinolin-4-yl)-2-methyl-4-(4H-1,2,4-triazol-3-yl)-1H-benzo[d]imidazol-6-yl)picolinonitrile ((*M*)-14).** The atropisomers of (*rac*)-14 were separated using SFC CHIRALPAK OJ-H 5uM 21x250mm column eluting with 30% MeOH/CO<sub>2</sub> at 60 mL/min (multiple injections). The appropriate fractions were pooled and concentrated to afford (*P*)-14 (first eluting peak) and (*M*)-14 (second eluting peak). <sup>1</sup>H NMR (400 MHz, CDCl<sub>3</sub>) δ 13.33 (s, 1H), 9.32 (d, J = 4.4 Hz, 1H), 8.70 (dd, J = 5.2, 0.8 Hz, 1H), 8.50 – 8.47 (m, 1H), 8.16 (d, J = 0.8 Hz, 1H), 7.88 (dd, J = 2.0, 0.8 Hz, 1H), 7.75 (dd, J = 5.2, 1.9 Hz, 1H), 7.65 (d, J = 4.5 Hz, 1H), 7.56 (td, J = 9.0, 4.2 Hz, 1H), 7.30 – 7.22 (m, 1H), 7.20 (d, J = 1.8 Hz, 1H), 2.54 (s, 3H). *m/z* calcd for C<sub>25</sub>H<sub>15</sub>F<sub>2</sub>N<sub>8</sub> [M+H]<sup>+</sup> 465.1, found ESI MS *m/z* 465.1 [M+H]<sup>+</sup>.

### 3. CHARACTERIZATION OF FINAL COMPOUNDS

\*All final compounds were isolated as TFA salts and were determined to be at least 95% pure by LC analysis.

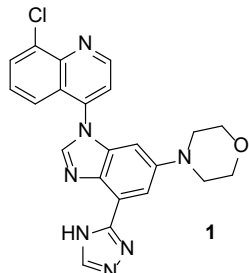

**4-(1-(8-chloroquinolin-4-yl)-4-(4H-1,2,4-triazol-3-yl)-1H-benzo[d]imidazol-6-yl)morpholine.**  $^1\text{H}$  NMR (400 MHz, DMSO- $d_6$ )  $\delta$  9.30 (d,  $J = 4.6$  Hz, 1H), 9.12 (s, 1H), 8.50 (s, 1H), 8.14 (dd,  $J = 7.4, 1.3$  Hz, 1H), 8.04 (d,  $J = 4.6$  Hz, 1H), 7.81 (d,  $J = 2.3$  Hz, 1H), 7.69 – 7.62 (m, 1H), 7.61 – 7.56 (m, 1H), 6.87 (d,  $J = 2.3$  Hz, 1H), 3.69 (t,  $J = 4.8$  Hz, 4H), 3.13 – 3.07 (m, 4H).  $m/z$  calcd for  $\text{C}_{22}\text{H}_{19}\text{ClN}_7\text{O}$   $[\text{M}+\text{H}]^+$  432.1, found ESI MS  $m/z$  432.1  $[\text{M}+\text{H}]^+$ .

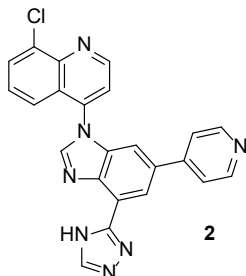

**8-chloro-4-(6-(pyridin-4-yl)-4-(4H-1,2,4-triazol-3-yl)-1H-benzo[d]imidazol-1-yl)quinoline.**  $^1\text{H}$  NMR (400 MHz, DMSO- $d_6$ )  $\delta$  9.34 – 9.26 (m, 1H), 9.02 (s, 1H), 8.77 – 8.71 (m, 2H), 8.48 (d,  $J = 1.7$  Hz, 1H), 8.39 (s, 1H), 8.14 – 8.06 (m, 4H), 7.99 (d,  $J = 1.7$  Hz, 1H), 7.63 (dd,  $J = 8.5, 7.4$  Hz, 1H), 7.55 (dd,  $J = 8.5, 1.3$  Hz, 1H).  $m/z$  calcd for  $\text{C}_{23}\text{H}_{15}\text{ClN}_7$   $[\text{M}+\text{H}]^+$  424.1, found ESI MS  $m/z$  424.1  $[\text{M}+\text{H}]^+$ .

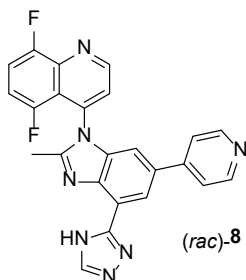

**5,8-difluoro-4-(2-methyl-6-(pyridin-4-yl)-4-(4H-1,2,4-triazol-3-yl)-1H-benzo[d]imidazol-1-yl)quinoline.** <sup>1</sup>H NMR (400 MHz, DMSO-d<sub>6</sub>) δ 9.33 (d, J = 4.5 Hz, 1H), 8.78 – 8.73 (m, 2H), 8.46 (dd, J = 1.8, 0.6 Hz, 1H), 8.23 – 8.16 (m, 2H), 8.09 (d, J = 4.5 Hz, 1H), 7.91 (dd, J = 1.8, 0.6 Hz, 1H), 7.79 (td, J = 9.5, 4.2 Hz, 1H), 7.47 (ddd, J = 12.3, 8.7, 3.8 Hz, 1H), 2.50 (s, 3H). *m/z* calcd for C<sub>24</sub>H<sub>16</sub>F<sub>2</sub>N<sub>7</sub> [M+H]<sup>+</sup> 440.1, found ESI MS *m/z* 440.1 [M+H]<sup>+</sup>.

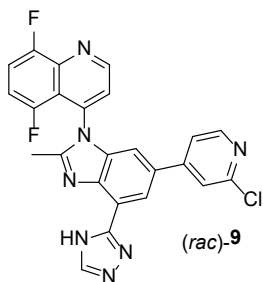

**4-(6-(2-chloropyridin-4-yl)-2-methyl-4-(4H-1,2,4-triazol-3-yl)-1H-benzo[d]imidazol-1-yl)-5,8-difluoroquinoline.** <sup>1</sup>H NMR (400 MHz, DMSO-d<sub>6</sub>) δ 9.36 (d, J = 4.5 Hz, 1H), 8.51 (s, 1H), 8.41 (dd, J = 5.3, 0.6 Hz, 1H), 8.38 (dd, J = 1.8, 0.9 Hz, 1H), 8.11 (d, J = 4.6 Hz, 1H), 7.88 – 7.75 (m, 4H), 7.50 (ddd, J = 12.3, 8.7, 3.8 Hz, 1H), 2.53 (d, J = 1.0 Hz, 3H). *m/z* calcd for C<sub>24</sub>H<sub>15</sub>F<sub>2</sub>N<sub>7</sub> [M+H]<sup>+</sup> 474.1, found ESI MS *m/z* 474.1 [M+H]<sup>+</sup>.

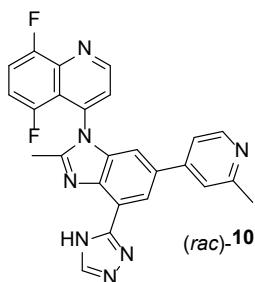

**5,8-difluoro-4-(2-methyl-6-(2-methylpyridin-4-yl)-4-(4H-1,2,4-triazol-3-yl)-1H-benzo[d]imidazol-1-yl)quinoline.** <sup>1</sup>H NMR (400 MHz, DMSO-d<sub>6</sub>) δ 9.34 (d, J = 4.5 Hz, 1H), 8.70 (dd, J = 6.4, 0.6 Hz, 1H), 8.48 (d, J = 1.8 Hz, 1H), 8.44 (s, 1H), 8.25 (d, J = 1.9 Hz, 1H), 8.15 (dd, J = 6.3, 2.0 Hz, 1H), 8.10 (d, J = 4.5 Hz, 1H), 7.90 (d, J = 1.8 Hz, 1H), 7.79 (ddd, J = 10.0, 8.8, 4.2 Hz, 1H), 7.47 (ddd, J = 12.3, 8.8, 3.8 Hz, 1H), 2.67 (s, 3H), 2.48 (s, 3H). *m/z* calcd for C<sub>25</sub>H<sub>18</sub>F<sub>2</sub>N<sub>7</sub> [M+H]<sup>+</sup> 454.1, found ESI MS *m/z* 454.2 [M+H]<sup>+</sup>.



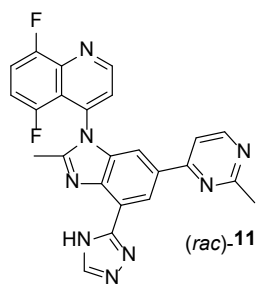

**5,8-difluoro-4-(2-methyl-6-(2-methylpyrimidin-4-yl)-4-(4H-1,2,4-triazol-3-yl)-1H-benzo[d]imidazol-1-yl)quinoline.**  $^1\text{H}$  NMR (400 MHz, DMSO- $d_6$ )  $\delta$  9.37 (d,  $J = 4.5$  Hz, 1H), 8.95 (d,  $J = 1.6$  Hz, 1H), 8.67 (d,  $J = 5.5$  Hz, 1H), 8.52 (s, 1H), 8.14 (d,  $J = 4.5$  Hz, 1H), 8.06 (d,  $J = 1.6$  Hz, 1H), 7.90 (dd,  $J = 5.5, 0.7$  Hz, 1H), 7.82 (ddd,  $J = 10.0, 8.8, 4.2$  Hz, 1H), 7.50 (ddd,  $J = 12.4, 8.8, 3.8$  Hz, 1H), 2.66 (s, 3H), 2.55 (s, 3H).  $m/z$  calcd for  $\text{C}_{24}\text{H}_{17}\text{F}_2\text{N}_8$   $[\text{M}+\text{H}]^+$  455.1, found ESI MS  $m/z$  455.2  $[\text{M}+\text{H}]^+$ .

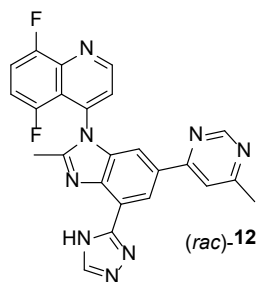

**5,8-difluoro-4-(2-methyl-6-(6-methylpyrimidin-4-yl)-4-(4H-1,2,4-triazol-3-yl)-1H-benzo[d]imidazol-1-yl)quinoline.**  $^1\text{H}$  NMR (400 MHz, DMSO- $d_6$ )  $\delta$  9.39 (d,  $J = 4.5$  Hz, 1H), 9.05 (d,  $J = 1.3$  Hz, 1H), 8.97 (d,  $J = 1.6$  Hz, 1H), 8.58 (s, 1H), 8.16 (d,  $J = 4.5$  Hz, 1H), 8.06 (d,  $J = 1.6$  Hz, 1H), 8.01 (dd,  $J = 1.3, 0.6$  Hz, 1H), 7.83 (ddd,  $J = 10.0, 8.8, 4.2$  Hz, 1H), 7.52 (ddd,  $J = 12.4, 8.8, 3.8$  Hz, 1H), 2.57 (s, 3H), 2.47 (s, 3H).  $m/z$  calcd for  $\text{C}_{24}\text{H}_{17}\text{F}_2\text{N}_8$   $[\text{M}+\text{H}]^+$  455.1, found ESI MS  $m/z$  455.2  $[\text{M}+\text{H}]^+$ .

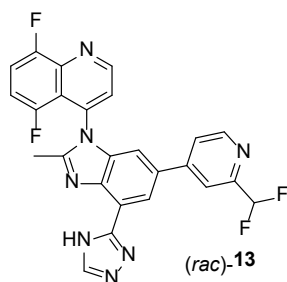

**4-(6-(2-(difluoromethyl)pyridin-4-yl)-2-methyl-4-(4H-1,2,4-triazol-3-yl)-1H-benzo[d]imidazol-1-yl)-5,8-difluoroquinoline.**  $^1\text{H}$  NMR (400 MHz, DMSO- $d_6$ )  $\delta$  9.34 (d,  $J = 4.5$  Hz, 1H), 8.66 (dd,  $J = 5.2, 0.7$  Hz, 1H), 8.53 (s, 1H), 8.41 (d,  $J = 1.7$  Hz, 1H), 8.11 (d,  $J = 4.5$  Hz, 1H), 7.97 (dd,  $J = 1.9, 0.7$  Hz, 1H), 7.91

– 7.87 (m, 1H), 7.86 (d, J = 1.7 Hz, 1H), 7.79 (ddd, J = 10.0, 8.8, 4.2 Hz, 1H), 7.48 (ddd, J = 12.4, 8.8, 3.8 Hz, 1H), 6.96 (t, J = 54.8 Hz, 1H), 2.53 (s, 3H). ES/MS  $m/z$  490.1 (M+H)<sup>+</sup>.

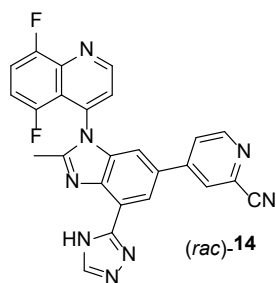

**4-(1-(5,8-difluoroquinolin-4-yl)-2-methyl-4-(4H-1,2,4-triazol-3-yl)-1H-benzo[d]imidazol-6-yl)picolinonitrile.** <sup>1</sup>H NMR (400 MHz, DMSO-d<sub>6</sub>) δ 9.34 (d, J = 4.5 Hz, 1H), 8.71 (dd, J = 5.3, 0.8 Hz, 1H), 8.50 (s, 1H), 8.43 (d, J = 1.7 Hz, 1H), 8.39 (dd, J = 2.0, 0.8 Hz, 1H), 8.11 – 8.07 (m, 2H), 7.87 (d, J = 1.7 Hz, 1H), 7.79 (ddd, J = 10.1, 8.8, 4.3 Hz, 1H), 7.48 (ddd, J = 12.3, 8.8, 3.8 Hz, 1H), 2.52 (s, 3H).  $m/z$  calcd for C<sub>25</sub>H<sub>15</sub>F<sub>2</sub>N<sub>8</sub> [M+H]<sup>+</sup> 465.1, found ESI MS  $m/z$  465.1 [M+H]<sup>+</sup>.

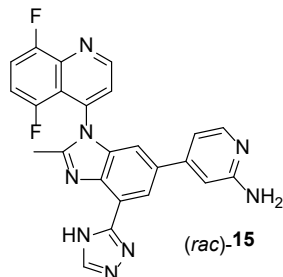

**4-(1-(5,8-difluoroquinolin-4-yl)-2-methyl-4-(4H-1,2,4-triazol-3-yl)-1H-benzo[d]imidazol-6-yl)pyridin-2-amine.** <sup>1</sup>H NMR (400 MHz, DMSO-d<sub>6</sub>) δ 9.32 (d, J = 4.5 Hz, 1H), 8.30 (d, J = 1.3 Hz, 1H), 8.07 (d, J = 4.7 Hz, 1H), 7.89 (d, J = 6.8 Hz, 1H), 7.87 – 7.74 (m, 4H), 7.69 (s, 1H), 7.52 – 7.36 (m, 1H), 7.26 – 7.19 (m, 2H), 2.52 (s, 3H).  $m/z$  calcd for C<sub>24</sub>H<sub>17</sub>F<sub>2</sub>N<sub>8</sub> [M+H]<sup>+</sup> 455.1, found ESI MS  $m/z$  455.2 [M+H]<sup>+</sup>.

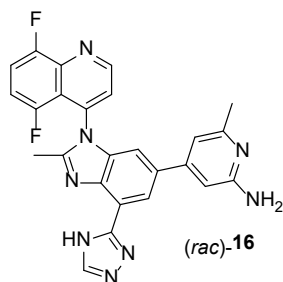

**4-(1-(5,8-difluoroquinolin-4-yl)-2-methyl-4-(4H-1,2,4-triazol-3-yl)-1H-benzo[d]imidazol-6-yl)-6-methylpyridin-2-amine.** <sup>1</sup>H NMR (400 MHz, DMSO-d<sub>6</sub>) δ 9.33 (d, J = 4.5 Hz, 1H), 8.30 (d, J = 1.7 Hz,

1H), 8.08 (d, J = 4.5 Hz, 1H), 7.84 – 7.75 (m, 1H), 7.64 (s, 1H), 7.60 (s, 2H), 7.47 (ddd, J = 12.3, 8.8, 3.8 Hz, 1H), 7.10 (s, 1H), 7.06 (s, 1H), 2.45 (s, 3H), 2.39 (s, 3H). ES/MS  $m/z$  469.2 (M+H)<sup>+</sup>.  $m/z$  calcd for C<sub>25</sub>H<sub>19</sub>F<sub>2</sub>N<sub>8</sub> [M+H]<sup>+</sup> 469.2, found ESI MS  $m/z$  469.2 [M+H]<sup>+</sup>.

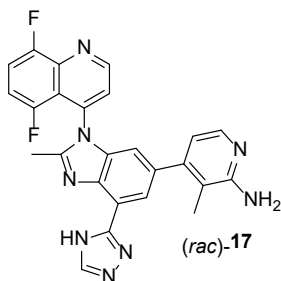

**4-(1-(5,8-difluoroquinolin-4-yl)-2-methyl-4-(4H-1,2,4-triazol-3-yl)-1H-benzo[d]imidazol-6-yl)-3-methylpyridin-2-amine.** <sup>1</sup>H NMR (400 MHz, DMSO-d<sub>6</sub>) δ 9.28 (d, J = 4.5 Hz, 1H), 8.06 (d, J = 4.5 Hz, 1H), 7.88 (d, J = 1.6 Hz, 1H), 7.84 – 7.74 (m, 4H), 7.47 (ddd, J = 12.3, 8.8, 3.9 Hz, 1H), 7.29 (s, 1H), 6.83 (d, J = 6.6 Hz, 1H), 1.99 (s, 3H).  $m/z$  calcd for C<sub>25</sub>H<sub>19</sub>F<sub>2</sub>N<sub>8</sub> [M+H]<sup>+</sup> 469.2, found ESI MS  $m/z$  469.2 [M+H]<sup>+</sup>.

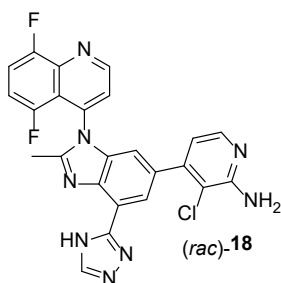

**3-chloro-4-(1-(5,8-difluoroquinolin-4-yl)-2-methyl-4-(4H-1,2,4-triazol-3-yl)-1H-benzo[d]imidazol-6-yl)pyridin-2-amine.** <sup>1</sup>H NMR (400 MHz, DMSO-d<sub>6</sub>) δ 9.30 (d, J = 4.5 Hz, 1H), 8.47 (s, 1H), 8.10 (d, J = 4.5 Hz, 1H), 8.07 (d, J = 1.6 Hz, 1H), 7.90 (d, J = 5.6 Hz, 1H), 7.78 (td, J = 9.4, 4.2 Hz, 1H), 7.49 (ddd, J = 12.4, 8.9, 3.8 Hz, 1H), 7.41 (d, J = 1.6 Hz, 1H), 6.70 (d, J = 5.6 Hz, 1H), 2.55 (s, 3H). ES/MS  $m/z$  489.2 (M+H)<sup>+</sup>.  $m/z$  calcd for C<sub>24</sub>H<sub>16</sub>ClF<sub>2</sub>N<sub>8</sub> [M+H]<sup>+</sup> 489.1, found ESI MS  $m/z$  489.2 [M+H]<sup>+</sup>.

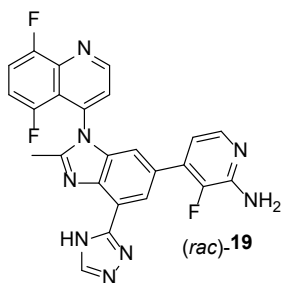

**4-(1-(5,8-difluoroquinolin-4-yl)-2-methyl-4-(4H-1,2,4-triazol-3-yl)-1H-benzo[d]imidazol-6-yl)-3-fluoropyridin-2-amine.** <sup>1</sup>H NMR (400 MHz, DMSO-d<sub>6</sub>) δ 9.31 (d, J = 4.5 Hz, 1H), 8.41 (br s, 1H), 8.22 (s, 1H), 8.09 (d, J = 4.5 Hz, 1H), 7.78 (td, J = 9.5, 4.2 Hz, 1H), 7.74 (dd, J = 6.2, 0.9 Hz, 1H), 7.52 (s, 1H), 7.47 (ddd, J = 12.3, 8.8, 3.8 Hz, 1H), 6.84 (br s, 1H), 2.51 (s, 3H). *m/z* calcd for C<sub>24</sub>H<sub>16</sub>F<sub>3</sub>N<sub>8</sub> [M+H]<sup>+</sup> 473.1, found ESI MS *m/z* 473.2 [M+H]<sup>+</sup>.

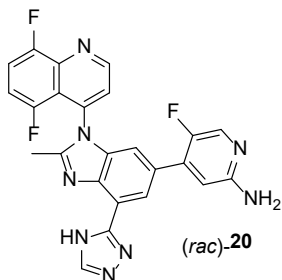

**4-(1-(5,8-difluoroquinolin-4-yl)-2-methyl-4-(4H-1,2,4-triazol-3-yl)-1H-benzo[d]imidazol-6-yl)-5-fluoropyridin-2-amine.** <sup>1</sup>H NMR (400 MHz, DMSO-d<sub>6</sub>) δ 9.31 (d, J = 4.5 Hz, 1H), 8.42 (br s, 1H), 8.17 (t, J = 1.8 Hz, 1H), 8.10 (s, 1H), 8.09 (s, 1H), 7.83 – 7.75 (m, 1H), 7.53 – 7.43 (m, 2H), 6.82 (d, J = 6.0 Hz, 1H), 2.50 (s, 3H). *m/z* calcd for C<sub>24</sub>H<sub>16</sub>F<sub>3</sub>N<sub>8</sub> [M+H]<sup>+</sup> 473.1, found ESI MS *m/z* 473.2 [M+H]<sup>+</sup>.

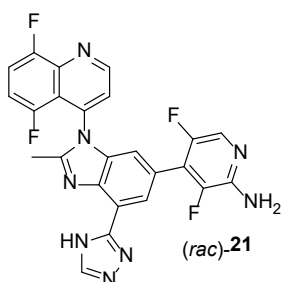

**4-(1-(5,8-difluoroquinolin-4-yl)-2-methyl-4-(4H-1,2,4-triazol-3-yl)-1H-benzo[d]imidazol-6-yl)-3,5-difluoropyridin-2-amine.** <sup>1</sup>H NMR (400 MHz, DMSO-d<sub>6</sub>) δ 9.30 (d, J = 4.5 Hz, 1H), 8.47 (s, 1H), 8.10 (d, J = 4.6 Hz, 1H), 8.06 (d, J = 1.4 Hz, 1H), 7.87 (t, J = 0.6 Hz, 1H), 7.82 – 7.75 (m, 1H), 7.52 – 7.44 (m, 2H), 2.55 (s, 3H). *m/z* calcd for C<sub>24</sub>H<sub>15</sub>F<sub>4</sub>N<sub>8</sub> [M+H]<sup>+</sup> 491.1, found ESI MS *m/z* 491.1 [M+H]<sup>+</sup>.

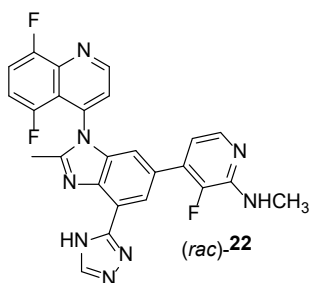

**4-(1-(5,8-difluoroquinolin-4-yl)-2-methyl-4-(4H-1,2,4-triazol-3-yl)-1H-benzo[d]imidazol-6-yl)-3-fluoro-N-methylpyridin-2-amine.** <sup>1</sup>H NMR (400 MHz, DMSO-d<sub>6</sub>) δ 9.31 (d, J = 4.5 Hz, 1H), 8.47 (s, 1H), 8.23 (t, J = 1.6 Hz, 1H), 8.10 (d, J = 4.5 Hz, 1H), 7.83 – 7.75 (m, 2H), 7.53 (s, 1H), 7.48 (ddd, J = 12.3, 8.8, 3.8 Hz, 1H), 6.74 (t, J = 5.6 Hz, 1H), 2.87 (s, 3H), 2.53 (s, 3H). *m/z* calcd for C<sub>25</sub>H<sub>18</sub>F<sub>3</sub>N<sub>8</sub> [M+H]<sup>+</sup> 487.2, found ESI MS *m/z* 487.2 [M+H]<sup>+</sup>.

**4. PI3K BIOCHEMICAL ASSAYS.** Enzymatic activity of the class I PI3K isoforms was measured using a time resolved fluorescence resonance energy transfer (TR-FRET) assay that monitors formation of the product 3,4,5-inositol triphosphate molecule (PIP<sub>3</sub>). Human full length p110 $\alpha$  and human p110 $\delta$  catalytic subunits were co-expressed with the p85 $\alpha$  regulatory subunit and purified as heterodimers. Human full length p110 $\gamma$  was expressed and purified without a regulatory subunit. PI3K $\beta$  was purchased from Millipore (Billerica, MA) (item 14-603, lot 1994929-B). All assay reagents and buffers for the TR-FRET assay were purchased from Millipore (Dundee, Ireland) (item 33-036, lot 1812413). PI3K isoforms were assayed under initial rate conditions (2 x K<sub>m</sub> ATP, 10 uM PIP<sub>2</sub>) at the following concentrations for each isoform: PI3K  $\alpha$ ,  $\beta$ , at 100 pM,  $\delta$  at 20 pM, and PI3K $\gamma$  at 5 nM. After an assay reaction time of 30 minutes at 25 °C, reactions were terminated with a final concentration of 10 mM EDTA, 10 nM labeled-PIP<sub>3</sub>, and 35 nM Europium labeled GRP-1 detector protein before reading TR-FRET on an Envision plate reader (Ex: 340 nm; Em: 615/665 nm). Data were normalized based on a positive (1  $\mu$ M wortmannin) and negative (0.5% DMSO) control and IC<sub>50</sub> values were calculated from the fit of the dose-response curves to a four-parameter equation. All IC<sub>50</sub> values represent geometric mean values of a minimum of four determinations.

**5. EC<sub>50</sub> (pAKT1), PI3K $\beta$ .** Inhibition of pAKT1 S<sup>473</sup> was assessed PC3, LNCaP, MDA-MB-415, ZR-75-1 and A498 cell lines were cultured according to ATCC guidelines to log phase growth and seeded in 96 well microtiter plates at 20,000 cells per well. The compound was applied from 1.0  $\mu$ M to 0.0005  $\mu$ M along a 36-point gradient and incubated 2 hours at 37 °C 100%RH. Cells were lysed (Cell Signaling Technology #9803 with 1mM PMSF #8553) and assessed for AKT1 and pAKT1 S<sup>473</sup> quantitatively by Mesoscale Diagnostics (MSD) kits K150MOD and K150MND, respectively. Data determined from the ratio of Units pAKT1 S<sup>473</sup> per nanogram total AKT1.

**6. HEPATOCYTE METABOLIC STABILITY ASSAY.** Cryopreserved hepatocytes were thawed according to the protocol provided by the manufacturer and resuspended in KHB buffer at a final test compound concentration of 1  $\mu$ M (1 million cells/mL). Incubations were allowed to proceed with gentle

rocking in a 37°C cell culture incubator with a 5% carbon dioxide/95% air atmosphere and saturating humidity. Aliquots were taken from each well at 0, 75, 110, 180 and 250 min and quenched, processed and analyzed by ultra-high pressure liquid chromatography (UHPLC) with high resolution mass (HRMS) detection. Half-lives of parent compounds were calculated using linear regression of log-transformed percent remaining over time. Predicted clearances were calculated using the well-stirred liver model.

**7. CACO-2 PERMEABILITY.** Caco-2 cells were maintained in Dulbecco's Modification of Eagle's Medium (DMEM) with sodium pyruvate, Glutmax supplemented with 1% Pen/Strep, 1% NEAA and 10% fetal bovine serum in an incubator set at 37°C, 90% humidity and 5% CO<sub>2</sub>. Caco-2 cells between passage 62 and 72 were seeded at 2100 cells / well and were grown to confluence over at least 21-days on 24 well PET (polyethylene-terephthalate) plates (BD Biosciences). Experiments are run using a new HBSS donor buffer from Invitrogen containing additional 10mM HEPES, 15mM Glucose with pH adjusted to pH 6.5. The receiver well uses HBSS buffer supplemented with 1% BSA and the pH adjusted to pH 7.4. After an initial equilibration with transport buffer, TEER values are read to test membrane integrity. The experiment is started by the addition of buffers containing test compounds and 100 µl of solution is taken at 1 and 2 hrs from the receiver compartment. Removed buffer is replaced with fresh buffer and a correction is applied to all calculations for the removed material. Each compound (10 µM) is tested in 2 separate replicate wells for each condition. All samples are immediately collected into 400 µl 100% acetonitrile acid to precipitate protein and stabilize test compounds. Cells are dosed on the apical or basolateral side to determine forward (A to B) and reverse (B to A) permeability. Permeability through a cell free trans-well is also determined as a measure of cellular permeability through the membrane and non-specific binding. To test for non-specific binding and compound instability the total amount of drug is quantitated at the end of the experiment and compared to the material present in the original dosing solution as a percent recovery. Samples are analyzed by LC/MS/MS.

The apparent permeability,  $P_{app}$ , and % recovery were calculated as follows:

$$P_{app} = (dR/dt) \times V_r / (A \times D_0)$$

$$\% \text{ Recovery} = 100 \times ((V_r \times R_{120}) + (V_d \times D_{120})) / (V_d \times D_0)$$

Where,

$dR/dt$  is the slope of the cumulative concentration in the receiver compartment versus time in µM/s based on receiver concentrations measured at 60 and 120 minutes.

$V_r$  and  $V_d$  is the volume in the receiver and donor compartment in  $\text{cm}^3$ , respectively.

$A$  is the area of the cell monolayer ( $0.33 \text{ cm}^2$ ).

$D_0$  and  $D_{120}$  is the measured donor concentration at the beginning and end of the experiment, respectively.

$R_{120}$  is the receiver concentration at the end of the experiment (120 minutes).

**8. PHARMACOKINETICS.** Pharmacokinetic studies were performed in naive male prague-Dawley rats, male Beagle dogs, male Cynomolgus monkeys and male Rhesus monkeys (three animals per dosing route) following federal and Institutional Animal Care and Use Committee (IACUC) guidelines. The intravenous administration was dosed via infusion over 30 min and oral dosing was administered by gavage. Blood samples were collected over a 24 h period post-dose into Vacutainer tubes containing EDTA-K2. Plasma was isolated, and the concentration of the test compound in plasma was determined with ESI+ LC/MS/MS after protein precipitation with acetonitrile. Non-compartmental pharmacokinetic analysis was performed on the plasma concentration-time data. The intravenous doses of were formulated in 40% PEG 300 and 60% water. The oral doses were formulated in 40% PEG 300 and 60% water.

**9. OCULAR ASSESSMENT.** The toxicology profile of *P*-(14) was evaluated in a 7 day repeat dose dog study. In addition to routine ophthalmic exams, detailed ocular assessments of electroretinography (ERG) and optical coherence tomography (OCT) were included. Male beagle dogs (3/group) were dosed daily with *P*-(14) at 0 (vehicle), 10, 40 and 100 mg/kg/day. Based on poor tolerability, high dose animals were euthanized after the second dose on Day 2. Dosing was suspended in the 40 mg/kg/day group on Day 4 and resumed on Day 5 at 30 mg/kg/day. Ocular toxicity, characterized by both structural and functional effects, was present at the low and mid dose levels and was considered likely irreversible. Clinical observations indicated decreased response to visual stimuli, dilated pupils, red conjunctiva and ocular discharge in all animals beginning on Day 4 through the end of the study.

Ophthalmic evaluations, ERG and OCT were conducted before the beginning of the study (pre-dose) and on Day 6. ERG assessment following dark-adaptation indicated that all dogs in the 10 and 40/30 mg/kg/day groups had no response to single light flashes of 0.01, 0.06, or 2.5 cd·s/m<sup>2</sup>. Ophthalmic evaluation (slit lamp biomicroscope/indirect ophthalmoscopy) revealed decreased tapetum in 2/3 dogs at 10 mg/kg/day with complete loss of tapetum in 3/3 dogs and retinal detachment in 2/3 dogs at 40/30 mg/kg/day.

OCT imaging confirmed the tapetal changes and retinal detachment. Additional effects noted with OCT included photoreceptor layers appearing as an indistinct single hyper-reflective band and swelling of the optic nerve in the 10 and 40/30 mg/kg/day dose groups. Microscopically, retinal degeneration/necrosis and choroidal inflammation were noted in all animals, including animals in the 100 mg/kg/day dose group.

**Table S3. Toxicokinetic exposure margins**

|                                    | 10 mg/kg QD | 40/30 mg/kg QD | 50 mg/kg BID* |
|------------------------------------|-------------|----------------|---------------|
| <b>AUC<sub>0-24h</sub> (μM·hr)</b> | 49          | 220            | 256           |
| <b>C<sub>max</sub> (μM)</b>        | 4.4         | 12.7           | 14.5          |
| <b>AUC Margin**</b>                | 1.8x        | 8.1x           | 9.5x          |
| <b>C<sub>max</sub> Margin**</b>    | 2.9x        | 8.5x           | 9.7x          |

\*2<sup>nd</sup> dose given 8 hours after 1<sup>st</sup>

\*\*Calculated after single dose, using predicted human AUC<sub>0-24</sub>= 27 μM·h , C<sub>max</sub> = 1.5 μM



**Figure S1. Functional ERG response of the retina to increasing light stimulus**

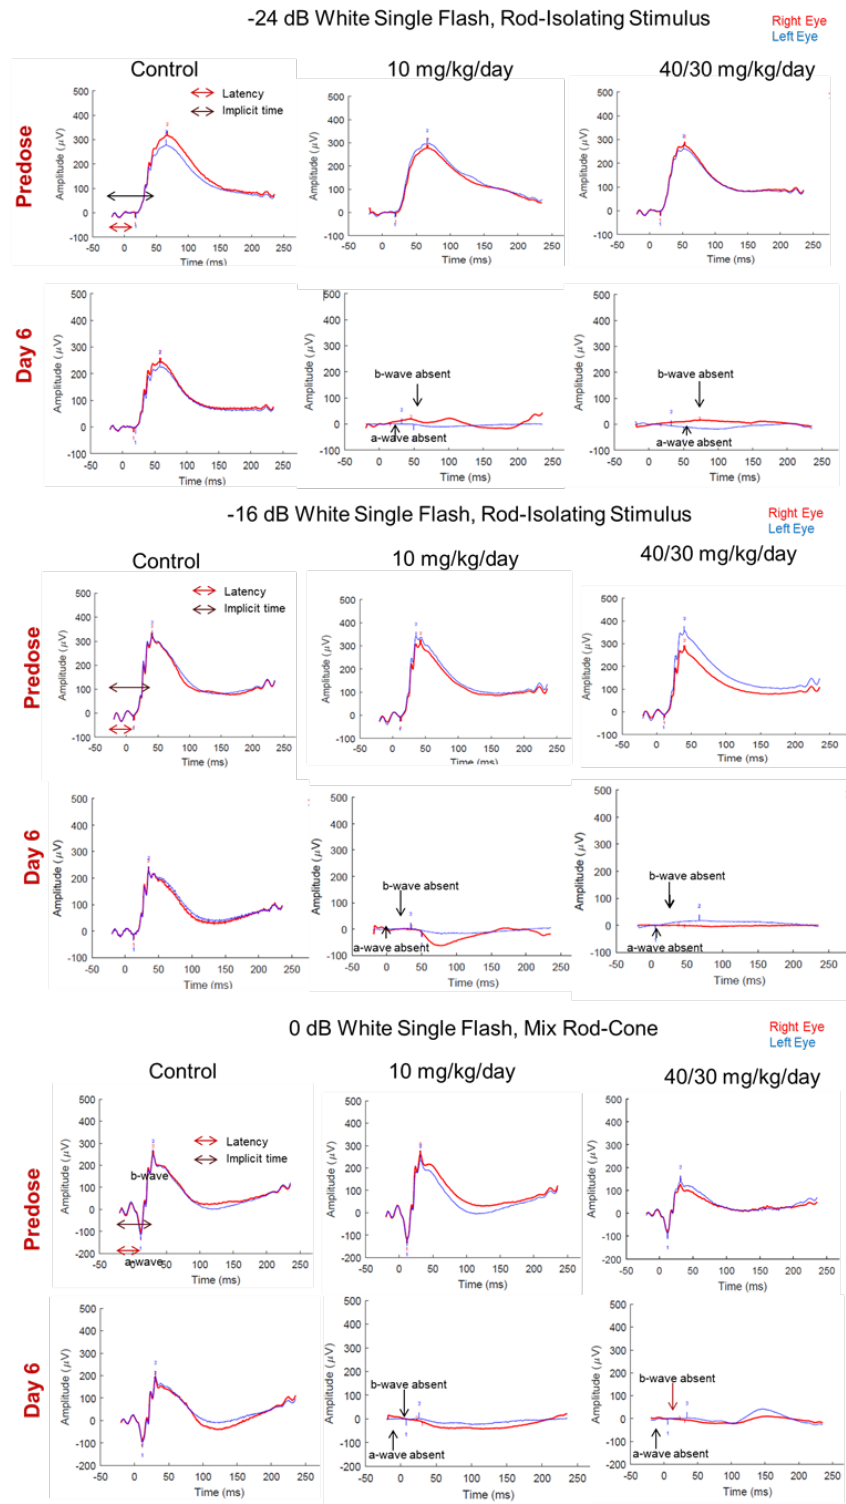

Figure S2. OCT images showing ocular effects at 10 mg/kg/day

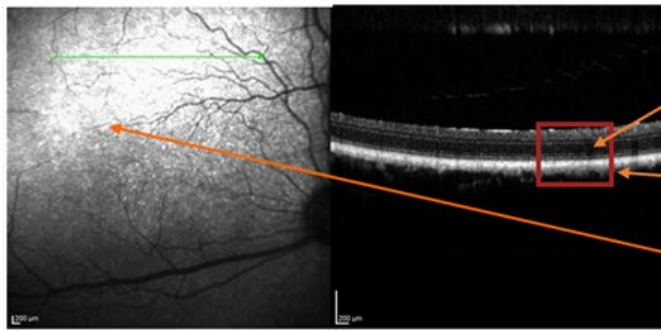

**Predose**

Distinct retinal layers

Retina fully intact

Tapetum intact

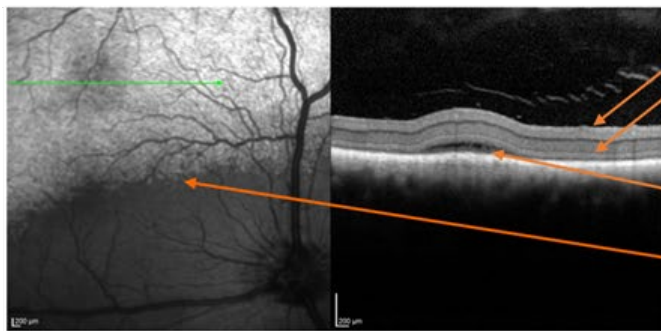

**Day 6**

Indistinct, hyperreflective retinal layers

Minimal retinal detachment

Tapetum has distinct border and is smaller

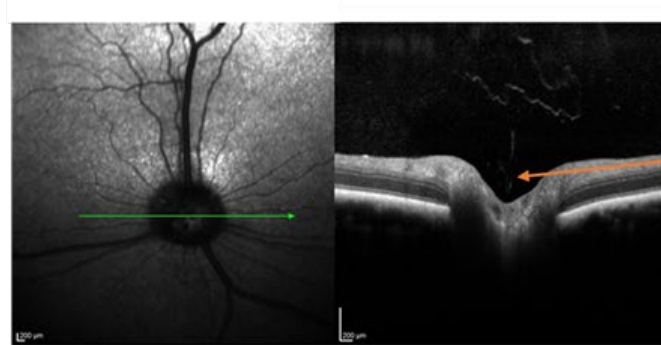

**Predose**

Normal optic nerve head

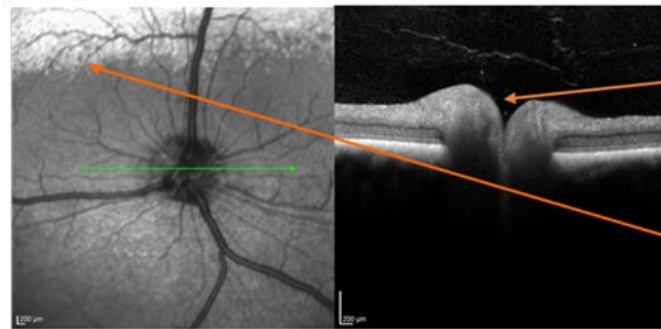

**Day 6**

Swelling around optic nerve head

Tapetum has distinct border and is smaller

Figure S3. OCT images showing ocular effects at 40/30 mg/kg/day

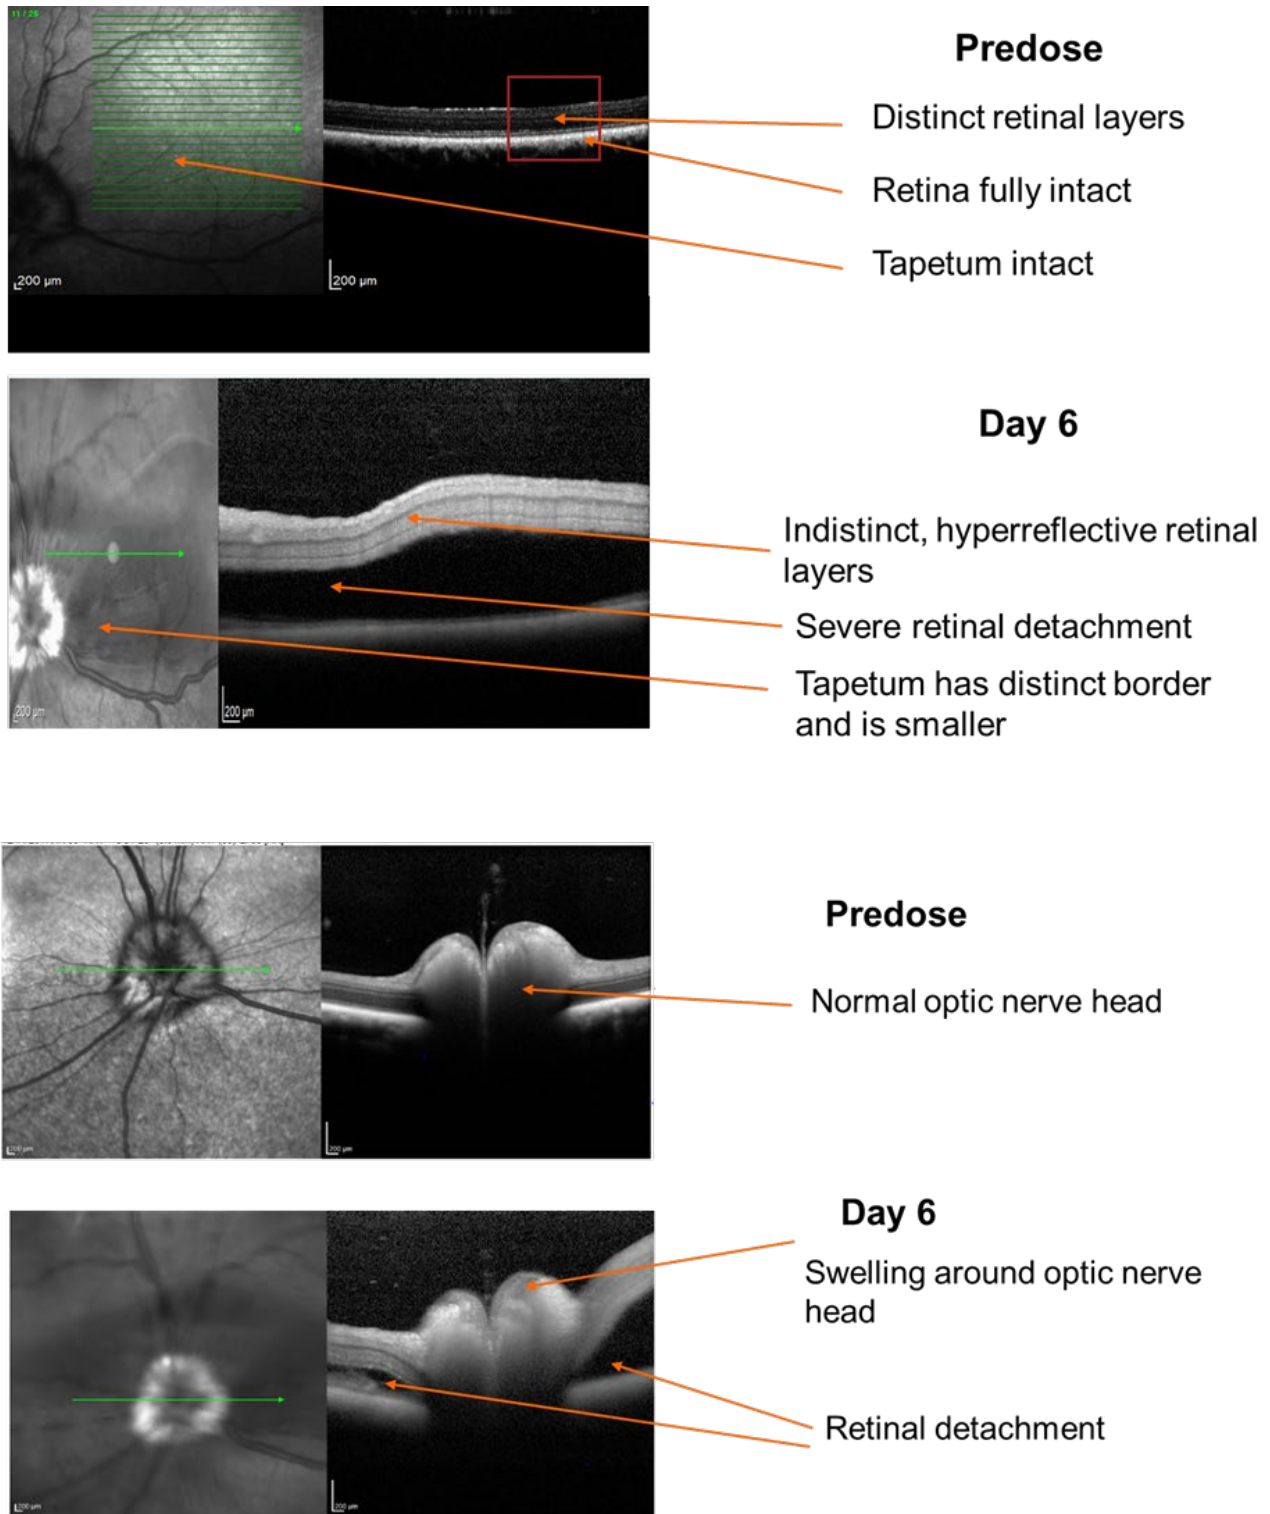

## 10. KINASE SELECTIVITY PROFILE OF (P-14)

Compound (P)-14 was screened at 10  $\mu\text{M}$  in the KINOMEScan<sup>®</sup> (DiscoverX, San Diego, CA) assay, and the results for the primary screen binding interactions are reported as “percent control”, where lower numbers indicate stronger hits in the matrix. For the kinase selectivity profile of (P)-19, see *J. Med. Chem.* **2018**, *61*, 6858-6868.

**Figure S4.** Protein and lipid kinase selectivity profiles of (P)-14 using the DiscoverX KINOMEScan<sup>®</sup> platform at a compound concentration of 10  $\mu\text{M}$ . PI3K $\beta$  highlighted with a blue circle. Image generated using TREEspot<sup>™</sup> Software Tool and reprinted with permission from KINOMEScan<sup>®</sup>, a division of DiscoverX Corporation, © DISCOVERX CORPORATION 2010.

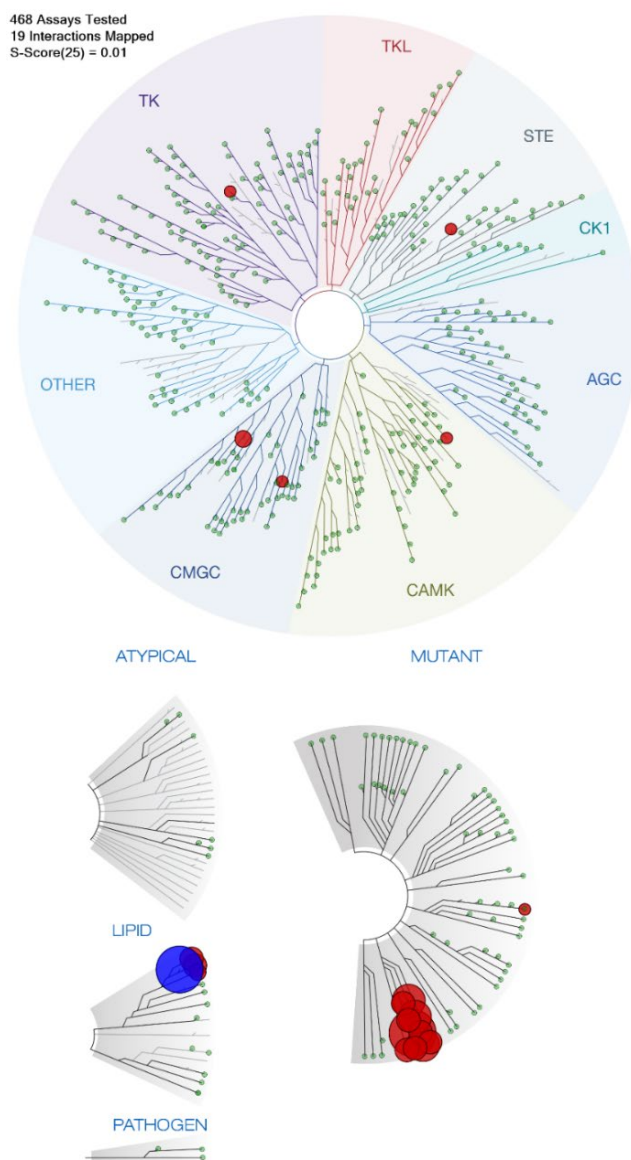

**Table S4. Dose responses ( $K_d$  values) of (P)-14 using the DiscoverX KINOMEScan® platform.**

| DiscoverX Gene Symbol | $K_d$ (nM) |
|-----------------------|------------|
| CDK7                  | 1,300      |
| HIPK4                 | 5,700      |
| MEK5                  | 5,200      |
| PIK3CB                | 0.49       |

**Table S5. DiscoverX KINOMEScan primary screen data of compound (P)-14 at 10  $\mu$ M**

| DiscoverX Gene Symbol         | Entrez Gene Symbol | Percent Control | Compound Concentration (nM) |
|-------------------------------|--------------------|-----------------|-----------------------------|
| AAK1                          | AAK1               | 95              | 10000                       |
| ABL1(E255K)-phosphorylated    | ABL1               | 92              | 10000                       |
| ABL1(F317I)-nonphosphorylated | ABL1               | 96              | 10000                       |
| ABL1(F317I)-phosphorylated    | ABL1               | 87              | 10000                       |
| ABL1(F317L)-nonphosphorylated | ABL1               | 88              | 10000                       |
| ABL1(F317L)-phosphorylated    | ABL1               | 100             | 10000                       |
| ABL1(H396P)-nonphosphorylated | ABL1               | 74              | 10000                       |
| ABL1(H396P)-phosphorylated    | ABL1               | 100             | 10000                       |
| ABL1(M351T)-phosphorylated    | ABL1               | 100             | 10000                       |
| ABL1(Q252H)-nonphosphorylated | ABL1               | 67              | 10000                       |
| ABL1(Q252H)-phosphorylated    | ABL1               | 100             | 10000                       |
| ABL1(T315I)-nonphosphorylated | ABL1               | 98              | 10000                       |
| ABL1(T315I)-phosphorylated    | ABL1               | 100             | 10000                       |
| ABL1(Y253F)-phosphorylated    | ABL1               | 93              | 10000                       |
| ABL1-nonphosphorylated        | ABL1               | 69              | 10000                       |
| ABL1-phosphorylated           | ABL1               | 85              | 10000                       |
| ABL2                          | ABL2               | 100             | 10000                       |
| ACVR1                         | ACVR1              | 92              | 10000                       |
| ACVR1B                        | ACVR1B             | 98              | 10000                       |
| ACVR2A                        | ACVR2A             | 69              | 10000                       |
| ACVR2B                        | ACVR2B             | 80              | 10000                       |
| ACVRL1                        | ACVRL1             | 100             | 10000                       |
| ADCK3                         | CABC1              | 79              | 10000                       |
| ADCK4                         | ADCK4              | 93              | 10000                       |
| AKT1                          | AKT1               | 91              | 10000                       |
| AKT2                          | AKT2               | 97              | 10000                       |
| AKT3                          | AKT3               | 97              | 10000                       |
| ALK                           | ALK                | 91              | 10000                       |
| ALK(C1156Y)                   | ALK                | 100             | 10000                       |
| ALK(L1196M)                   | ALK                | 92              | 10000                       |

|             |        |     |       |
|-------------|--------|-----|-------|
| AMPK-alpha1 | PRKAA1 | 87  | 10000 |
| AMPK-alpha2 | PRKAA2 | 94  | 10000 |
| ANKK1       | ANKK1  | 100 | 10000 |
| ARK5        | NUAK1  | 97  | 10000 |
| ASK1        | MAP3K5 | 100 | 10000 |
| ASK2        | MAP3K6 | 91  | 10000 |
| AURKA       | AURKA  | 76  | 10000 |
| AURKB       | AURKB  | 73  | 10000 |
| AURKC       | AURKC  | 92  | 10000 |
| AXL         | AXL    | 90  | 10000 |
| BIKE        | BMP2K  | 97  | 10000 |
| BLK         | BLK    | 96  | 10000 |
| BMPR1A      | BMPR1A | 91  | 10000 |
| BMPR1B      | BMPR1B | 94  | 10000 |
| BMPR2       | BMPR2  | 90  | 10000 |
| BMX         | BMX    | 79  | 10000 |
| BRAF        | BRAF   | 95  | 10000 |
| BRAF(V600E) | BRAF   | 97  | 10000 |
| BRK         | PTK6   | 92  | 10000 |
| BRSK1       | BRSK1  | 73  | 10000 |
| BRSK2       | BRSK2  | 87  | 10000 |
| BTK         | BTK    | 69  | 10000 |
| BUB1        | BUB1   | 96  | 10000 |
| CAMK1       | CAMK1  | 82  | 10000 |
| CAMK1B      | PNCK   | 94  | 10000 |
| CAMK1D      | CAMK1D | 91  | 10000 |
| CAMK1G      | CAMK1G | 100 | 10000 |
| CAMK2A      | CAMK2A | 90  | 10000 |
| CAMK2B      | CAMK2B | 80  | 10000 |
| CAMK2D      | CAMK2D | 98  | 10000 |
| CAMK2G      | CAMK2G | 100 | 10000 |
| CAMK4       | CAMK4  | 100 | 10000 |
| CAMKK1      | CAMKK1 | 92  | 10000 |
| CAMKK2      | CAMKK2 | 100 | 10000 |
| CASK        | CASK   | 91  | 10000 |
| CDC2L1      | CDK11B | 93  | 10000 |
| CDC2L2      | CDC2L2 | 66  | 10000 |
| CDC2L5      | CDK13  | 87  | 10000 |
| CDK11       | CDK19  | 84  | 10000 |
| CDK2        | CDK2   | 84  | 10000 |
| CDK3        | CDK3   | 100 | 10000 |

|                     |          |     |       |
|---------------------|----------|-----|-------|
| CDK4                | CDK4     | 93  | 10000 |
| CDK4-cyclinD1       | CDK4     | 76  | 10000 |
| CDK4-cyclinD3       | CDK4     | 98  | 10000 |
| CDK5                | CDK5     | 86  | 10000 |
| CDK7                | CDK7     | 78  | 10000 |
| CDK8                | CDK8     | 94  | 10000 |
| CDK9                | CDK9     | 93  | 10000 |
| CDKL1               | CDKL1    | 85  | 10000 |
| CDKL2               | CDKL2    | 99  | 10000 |
| CDKL3               | CDKL3    | 87  | 10000 |
| CDKL5               | CDKL5    | 99  | 10000 |
| CHEK1               | CHEK1    | 100 | 10000 |
| CHEK2               | CHEK2    | 89  | 10000 |
| CIT                 | CIT      | 82  | 10000 |
| CLK1                | CLK1     | 100 | 10000 |
| CLK2                | CLK2     | 99  | 10000 |
| CLK3                | CLK3     | 90  | 10000 |
| CLK4                | CLK4     | 85  | 10000 |
| CSF1R               | CSF1R    | 89  | 10000 |
| CSF1R-autoinhibited | CSF1R    | 90  | 10000 |
| CSK                 | CSK      | 86  | 10000 |
| CSNK1A1             | CSNK1A1  | 85  | 10000 |
| CSNK1A1L            | CSNK1A1L | 80  | 10000 |
| CSNK1D              | CSNK1D   | 72  | 10000 |
| CSNK1E              | CSNK1E   | 97  | 10000 |
| CSNK1G1             | CSNK1G1  | 94  | 10000 |
| CSNK1G2             | CSNK1G2  | 84  | 10000 |
| CSNK1G3             | CSNK1G3  | 100 | 10000 |
| CSNK2A1             | CSNK2A1  | 91  | 10000 |
| CSNK2A2             | CSNK2A2  | 84  | 10000 |
| CTK                 | MATK     | 85  | 10000 |
| DAPK1               | DAPK1    | 93  | 10000 |
| DAPK2               | DAPK2    | 87  | 10000 |
| DAPK3               | DAPK3    | 86  | 10000 |
| DCAMKL1             | DCLK1    | 75  | 10000 |
| DCAMKL2             | DCLK2    | 64  | 10000 |
| DCAMKL3             | DCLK3    | 100 | 10000 |
| DDR1                | DDR1     | 86  | 10000 |
| DDR2                | DDR2     | 96  | 10000 |
| DLK                 | MAP3K12  | 100 | 10000 |
| DMPK                | DMPK     | 99  | 10000 |

|                           |          |     |       |
|---------------------------|----------|-----|-------|
| DMPK2                     | CDC42BPG | 93  | 10000 |
| DRAK1                     | STK17A   | 97  | 10000 |
| DRAK2                     | STK17B   | 99  | 10000 |
| DYRK1A                    | DYRK1A   | 95  | 10000 |
| DYRK1B                    | DYRK1B   | 66  | 10000 |
| DYRK2                     | DYRK2    | 98  | 10000 |
| EGFR                      | EGFR     | 100 | 10000 |
| EGFR(E746-A750del)        | EGFR     | 99  | 10000 |
| EGFR(G719C)               | EGFR     | 92  | 10000 |
| EGFR(G719S)               | EGFR     | 99  | 10000 |
| EGFR(L747-E749del, A750P) | EGFR     | 100 | 10000 |
| EGFR(L747-S752del, P753S) | EGFR     | 82  | 10000 |
| EGFR(L747-T751del,Sins)   | EGFR     | 91  | 10000 |
| EGFR(L858R)               | EGFR     | 94  | 10000 |
| EGFR(L858R,T790M)         | EGFR     | 100 | 10000 |
| EGFR(L861Q)               | EGFR     | 96  | 10000 |
| EGFR(S752-I759del)        | EGFR     | 96  | 10000 |
| EGFR(T790M)               | EGFR     | 91  | 10000 |
| EIF2AK1                   | EIF2AK1  | 96  | 10000 |
| EPHA1                     | EPHA1    | 95  | 10000 |
| EPHA2                     | EPHA2    | 82  | 10000 |
| EPHA3                     | EPHA3    | 65  | 10000 |
| EPHA4                     | EPHA4    | 89  | 10000 |
| EPHA5                     | EPHA5    | 92  | 10000 |
| EPHA6                     | EPHA6    | 87  | 10000 |
| EPHA7                     | EPHA7    | 97  | 10000 |
| EPHA8                     | EPHA8    | 100 | 10000 |
| EPHB1                     | EPHB1    | 100 | 10000 |
| EPHB2                     | EPHB2    | 95  | 10000 |
| EPHB3                     | EPHB3    | 90  | 10000 |
| EPHB4                     | EPHB4    | 92  | 10000 |
| EPHB6                     | EPHB6    | 100 | 10000 |
| ERBB2                     | ERBB2    | 76  | 10000 |
| ERBB3                     | ERBB3    | 48  | 10000 |
| ERBB4                     | ERBB4    | 100 | 10000 |
| ERK1                      | MAPK3    | 90  | 10000 |
| ERK2                      | MAPK1    | 75  | 10000 |
| ERK3                      | MAPK6    | 91  | 10000 |
| ERK4                      | MAPK4    | 86  | 10000 |
| ERK5                      | MAPK7    | 100 | 10000 |
| ERK8                      | MAPK15   | 100 | 10000 |



|                       |         |     |       |
|-----------------------|---------|-----|-------|
| ERN1                  | ERN1    | 99  | 10000 |
| FAK                   | PTK2    | 100 | 10000 |
| FER                   | FER     | 98  | 10000 |
| FES                   | FES     | 100 | 10000 |
| FGFR1                 | FGFR1   | 85  | 10000 |
| FGFR2                 | FGFR2   | 100 | 10000 |
| FGFR3                 | FGFR3   | 88  | 10000 |
| FGFR3(G697C)          | FGFR3   | 98  | 10000 |
| FGFR4                 | FGFR4   | 89  | 10000 |
| FGR                   | FGR     | 89  | 10000 |
| FLT1                  | FLT1    | 95  | 10000 |
| FLT3                  | FLT3    | 74  | 10000 |
| FLT3(D835H)           | FLT3    | 87  | 10000 |
| FLT3(D835V)           | FLT3    | 71  | 10000 |
| FLT3(D835Y)           | FLT3    | 68  | 10000 |
| FLT3(ITD)             | FLT3    | 84  | 10000 |
| FLT3(ITD,D835V)       | FLT3    | 65  | 10000 |
| FLT3(ITD,F691L)       | FLT3    | 50  | 10000 |
| FLT3(K663Q)           | FLT3    | 78  | 10000 |
| FLT3(N841I)           | FLT3    | 100 | 10000 |
| FLT3(R834Q)           | FLT3    | 96  | 10000 |
| FLT3-autoinhibited    | FLT3    | 79  | 10000 |
| FLT4                  | FLT4    | 98  | 10000 |
| FRK                   | FRK     | 96  | 10000 |
| FYN                   | FYN     | 100 | 10000 |
| GAK                   | GAK     | 84  | 10000 |
| GCN2(Kin.Dom.2,S808G) | EIF2AK4 | 78  | 10000 |
| GRK1                  | GRK1    | 83  | 10000 |
| GRK2                  | ADRBK1  | 97  | 10000 |
| GRK3                  | ADRBK2  | 89  | 10000 |
| GRK4                  | GRK4    | 90  | 10000 |
| GRK7                  | GRK7    | 99  | 10000 |
| GSK3A                 | GSK3A   | 100 | 10000 |
| GSK3B                 | GSK3B   | 73  | 10000 |
| HASPIN                | GSG2    | 85  | 10000 |
| HCK                   | HCK     | 77  | 10000 |
| HIPK1                 | HIPK1   | 75  | 10000 |
| HIPK2                 | HIPK2   | 81  | 10000 |
| HIPK3                 | HIPK3   | 76  | 10000 |
| HIPK4                 | HIPK4   | 100 | 10000 |
| HPK1                  | MAP4K1  | 93  | 10000 |

|                               |         |     |       |
|-------------------------------|---------|-----|-------|
| HUNK                          | HUNK    | 98  | 10000 |
| ICK                           | ICK     | 65  | 10000 |
| IGF1R                         | IGF1R   | 90  | 10000 |
| IKK-alpha                     | CHUK    | 96  | 10000 |
| IKK-beta                      | IKBKB   | 90  | 10000 |
| IKK-epsilon                   | IKBKE   | 100 | 10000 |
| INSR                          | INSR    | 87  | 10000 |
| INSRR                         | INSRR   | 92  | 10000 |
| IRAK1                         | IRAK1   | 98  | 10000 |
| IRAK3                         | IRAK3   | 85  | 10000 |
| IRAK4                         | IRAK4   | 100 | 10000 |
| ITK                           | ITK     | 100 | 10000 |
| JAK1(JH1 domain-catalytic)    | JAK1    | 89  | 10000 |
| JAK1(JH2 domain-pseudokinase) | JAK1    | 30  | 10000 |
| JAK2(JH1 domain-catalytic)    | JAK2    | 81  | 10000 |
| JAK3(JH1 domain-catalytic)    | JAK3    | 85  | 10000 |
| JNK1                          | MAPK8   | 55  | 10000 |
| JNK2                          | MAPK9   | 61  | 10000 |
| JNK3                          | MAPK10  | 59  | 10000 |
| KIT                           | KIT     | 40  | 10000 |
| KIT(A829P)                    | KIT     | 65  | 10000 |
| KIT(D816H)                    | KIT     | 81  | 10000 |
| KIT(D816V)                    | KIT     | 68  | 10000 |
| KIT(L576P)                    | KIT     | 47  | 10000 |
| KIT(V559D)                    | KIT     | 40  | 10000 |
| KIT(V559D,T670I)              | KIT     | 48  | 10000 |
| KIT(V559D,V654A)              | KIT     | 94  | 10000 |
| KIT-autoinhibited             | KIT     | 95  | 10000 |
| LATS1                         | LATS1   | 89  | 10000 |
| LATS2                         | LATS2   | 84  | 10000 |
| LCK                           | LCK     | 95  | 10000 |
| LIMK1                         | LIMK1   | 80  | 10000 |
| LIMK2                         | LIMK2   | 97  | 10000 |
| LKB1                          | STK11   | 85  | 10000 |
| LOK                           | STK10   | 86  | 10000 |
| LRRK2                         | LRRK2   | 83  | 10000 |
| LRRK2(G2019S)                 | LRRK2   | 100 | 10000 |
| LTK                           | LTK     | 90  | 10000 |
| LYN                           | LYN     | 92  | 10000 |
| LZK                           | MAP3K13 | 99  | 10000 |
| MAK                           | MAK     | 48  | 10000 |

|             |          |     |       |
|-------------|----------|-----|-------|
| MAP3K1      | MAP3K1   | 73  | 10000 |
| MAP3K15     | MAP3K15  | 91  | 10000 |
| MAP3K2      | MAP3K2   | 94  | 10000 |
| MAP3K3      | MAP3K3   | 88  | 10000 |
| MAP3K4      | MAP3K4   | 100 | 10000 |
| MAP4K2      | MAP4K2   | 92  | 10000 |
| MAP4K3      | MAP4K3   | 90  | 10000 |
| MAP4K4      | MAP4K4   | 72  | 10000 |
| MAP4K5      | MAP4K5   | 80  | 10000 |
| MAPKAPK2    | MAPKAPK2 | 100 | 10000 |
| MAPKAPK5    | MAPKAPK5 | 100 | 10000 |
| MARK1       | MARK1    | 100 | 10000 |
| MARK2       | MARK2    | 79  | 10000 |
| MARK3       | MARK3    | 100 | 10000 |
| MARK4       | MARK4    | 99  | 10000 |
| MAST1       | MAST1    | 40  | 10000 |
| MEK1        | MAP2K1   | 100 | 10000 |
| MEK2        | MAP2K2   | 100 | 10000 |
| MEK3        | MAP2K3   | 87  | 10000 |
| MEK4        | MAP2K4   | 98  | 10000 |
| MEK5        | MAP2K5   | 2.2 | 10000 |
| MEK6        | MAP2K6   | 100 | 10000 |
| MELK        | MELK     | 98  | 10000 |
| MERTK       | MERTK    | 100 | 10000 |
| MET         | MET      | 96  | 10000 |
| MET(M1250T) | MET      | 90  | 10000 |
| MET(Y1235D) | MET      | 60  | 10000 |
| MINK        | MINK1    | 88  | 10000 |
| MKK7        | MAP2K7   | 86  | 10000 |
| MKNK1       | MKNK1    | 100 | 10000 |
| MKNK2       | MKNK2    | 67  | 10000 |
| MLCK        | MYLK3    | 100 | 10000 |
| MLK1        | MAP3K9   | 99  | 10000 |
| MLK2        | MAP3K10  | 70  | 10000 |
| MLK3        | MAP3K11  | 90  | 10000 |
| MRCKA       | CDC42BPA | 94  | 10000 |
| MRCKB       | CDC42BPB | 89  | 10000 |
| MST1        | STK4     | 87  | 10000 |
| MST1R       | MST1R    | 67  | 10000 |
| MST2        | STK3     | 54  | 10000 |
| MST3        | STK24    | 95  | 10000 |

|                       |          |     |       |
|-----------------------|----------|-----|-------|
| MST4                  | MST4     | 90  | 10000 |
| MTOR                  | MTOR     | 16  | 10000 |
| MUSK                  | MUSK     | 87  | 10000 |
| MYLK                  | MYLK     | 85  | 10000 |
| MYLK2                 | MYLK2    | 100 | 10000 |
| MYLK4                 | MYLK4    | 98  | 10000 |
| MYO3A                 | MYO3A    | 97  | 10000 |
| MYO3B                 | MYO3B    | 89  | 10000 |
| NDR1                  | STK38    | 86  | 10000 |
| NDR2                  | STK38L   | 91  | 10000 |
| NEK1                  | NEK1     | 100 | 10000 |
| NEK10                 | NEK10    | 89  | 10000 |
| NEK11                 | NEK11    | 85  | 10000 |
| NEK2                  | NEK2     | 86  | 10000 |
| NEK3                  | NEK3     | 60  | 10000 |
| NEK4                  | NEK4     | 76  | 10000 |
| NEK5                  | NEK5     | 100 | 10000 |
| NEK6                  | NEK6     | 93  | 10000 |
| NEK7                  | NEK7     | 76  | 10000 |
| NEK9                  | NEK9     | 78  | 10000 |
| NIK                   | MAP3K14  | 100 | 10000 |
| NIM1                  | MGC42105 | 89  | 10000 |
| NLK                   | NLK      | 100 | 10000 |
| OSR1                  | OXR1     | 100 | 10000 |
| p38-alpha             | MAPK14   | 88  | 10000 |
| p38-beta              | MAPK11   | 96  | 10000 |
| p38-delta             | MAPK13   | 81  | 10000 |
| p38-gamma             | MAPK12   | 75  | 10000 |
| PAK1                  | PAK1     | 100 | 10000 |
| PAK2                  | PAK2     | 100 | 10000 |
| PAK3                  | PAK3     | 66  | 10000 |
| PAK4                  | PAK4     | 99  | 10000 |
| PAK6                  | PAK6     | 88  | 10000 |
| PAK7                  | PAK7     | 74  | 10000 |
| PCTK1                 | CDK16    | 100 | 10000 |
| PCTK2                 | CDK17    | 100 | 10000 |
| PCTK3                 | CDK18    | 78  | 10000 |
| PDGFRA                | PDGFRA   | 97  | 10000 |
| PDGFRB                | PDGFRB   | 76  | 10000 |
| PDPK1                 | PDPK1    | 67  | 10000 |
| PFCDPK1(P.falciparum) | CDPK1    | 88  | 10000 |

|                               |             |      |       |
|-------------------------------|-------------|------|-------|
| PFPK5( <i>P.falciparum</i> )  | MAL13P1.279 | 100  | 10000 |
| PFTAIRE2                      | CDK15       | 90   | 10000 |
| PFTK1                         | CDK14       | 95   | 10000 |
| PHKG1                         | PHKG1       | 100  | 10000 |
| PHKG2                         | PHKG2       | 92   | 10000 |
| PIK3C2B                       | PIK3C2B     | 5    | 10000 |
| PIK3C2G                       | PIK3C2G     | 23   | 10000 |
| PIK3CA                        | PIK3CA      | 0    | 10000 |
| PIK3CA(C420R)                 | PIK3CA      | 0.85 | 10000 |
| PIK3CA(E542K)                 | PIK3CA      | 0.6  | 10000 |
| PIK3CA(E545A)                 | PIK3CA      | 0.65 | 10000 |
| PIK3CA(E545K)                 | PIK3CA      | 0.65 | 10000 |
| PIK3CA(H1047L)                | PIK3CA      | 0.3  | 10000 |
| PIK3CA(H1047Y)                | PIK3CA      | 0    | 10000 |
| PIK3CA(I800L)                 | PIK3CA      | 1.6  | 10000 |
| PIK3CA(M1043I)                | PIK3CA      | 1.4  | 10000 |
| PIK3CA(Q546K)                 | PIK3CA      | 0.6  | 10000 |
| PIK3CB                        | PIK3CB      | 5.9  | 10000 |
| PIK3CD                        | PIK3CD      | 7.4  | 10000 |
| PIK3CG                        | PIK3CG      | 43   | 10000 |
| PIK4CB                        | PI4KB       | 56   | 10000 |
| PIKFYVE                       | PIKFYVE     | 46   | 10000 |
| PIM1                          | PIM1        | 100  | 10000 |
| PIM2                          | PIM2        | 74   | 10000 |
| PIM3                          | PIM3        | 100  | 10000 |
| PIP5K1A                       | PIP5K1A     | 100  | 10000 |
| PIP5K1C                       | PIP5K1C     | 100  | 10000 |
| PIP5K2B                       | PIP4K2B     | 100  | 10000 |
| PIP5K2C                       | PIP4K2C     | 90   | 10000 |
| PKAC-alpha                    | PRKACA      | 59   | 10000 |
| PKAC-beta                     | PRKACB      | 98   | 10000 |
| PKMYT1                        | PKMYT1      | 92   | 10000 |
| PKN1                          | PKN1        | 79   | 10000 |
| PKN2                          | PKN2        | 85   | 10000 |
| PKNB( <i>M.tuberculosis</i> ) | pknB        | 79   | 10000 |
| PLK1                          | PLK1        | 100  | 10000 |
| PLK2                          | PLK2        | 89   | 10000 |
| PLK3                          | PLK3        | 84   | 10000 |
| PLK4                          | PLK4        | 72   | 10000 |
| PRKCD                         | PRKCD       | 93   | 10000 |
| PRKCE                         | PRKCE       | 100  | 10000 |

|                               |          |     |       |
|-------------------------------|----------|-----|-------|
| PRKCH                         | PRKCH    | 91  | 10000 |
| PRKCI                         | PRKCI    | 79  | 10000 |
| PRKCQ                         | PRKCQ    | 85  | 10000 |
| PRKD1                         | PRKD1    | 100 | 10000 |
| PRKD2                         | PRKD2    | 100 | 10000 |
| PRKD3                         | PRKD3    | 94  | 10000 |
| PRKG1                         | PRKG1    | 98  | 10000 |
| PRKG2                         | PRKG2    | 96  | 10000 |
| PRKR                          | EIF2AK2  | 100 | 10000 |
| PRKX                          | PRKX     | 88  | 10000 |
| PRP4                          | PRPF4B   | 72  | 10000 |
| PYK2                          | PTK2B    | 85  | 10000 |
| QSK                           | KIAA0999 | 80  | 10000 |
| RAF1                          | RAF1     | 94  | 10000 |
| RET                           | RET      | 99  | 10000 |
| RET(M918T)                    | RET      | 100 | 10000 |
| RET(V804L)                    | RET      | 100 | 10000 |
| RET(V804M)                    | RET      | 93  | 10000 |
| RIOK1                         | RIOK1    | 79  | 10000 |
| RIOK2                         | RIOK2    | 90  | 10000 |
| RIOK3                         | RIOK3    | 89  | 10000 |
| RIPK1                         | RIPK1    | 100 | 10000 |
| RIPK2                         | RIPK2    | 84  | 10000 |
| RIPK4                         | RIPK4    | 70  | 10000 |
| RIPK5                         | DSTYK    | 78  | 10000 |
| ROCK1                         | ROCK1    | 95  | 10000 |
| ROCK2                         | ROCK2    | 85  | 10000 |
| ROS1                          | ROS1     | 93  | 10000 |
| RPS6KA4(Kin.Dom.1-N-terminal) | RPS6KA4  | 98  | 10000 |
| RPS6KA4(Kin.Dom.2-C-terminal) | RPS6KA4  | 95  | 10000 |
| RPS6KA5(Kin.Dom.1-N-terminal) | RPS6KA5  | 85  | 10000 |
| RPS6KA5(Kin.Dom.2-C-terminal) | RPS6KA5  | 100 | 10000 |
| RSK1(Kin.Dom.1-N-terminal)    | RPS6KA1  | 88  | 10000 |
| RSK1(Kin.Dom.2-C-terminal)    | RPS6KA1  | 93  | 10000 |
| RSK2(Kin.Dom.1-N-terminal)    | RPS6KA3  | 78  | 10000 |
| RSK2(Kin.Dom.2-C-terminal)    | RPS6KA3  | 86  | 10000 |
| RSK3(Kin.Dom.1-N-terminal)    | RPS6KA2  | 85  | 10000 |
| RSK3(Kin.Dom.2-C-terminal)    | RPS6KA2  | 92  | 10000 |
| RSK4(Kin.Dom.1-N-terminal)    | RPS6KA6  | 96  | 10000 |
| RSK4(Kin.Dom.2-C-terminal)    | RPS6KA6  | 93  | 10000 |
| S6K1                          | RPS6KB1  | 85  | 10000 |

|        |        |     |       |
|--------|--------|-----|-------|
| SBK1   | SBK1   | 100 | 10000 |
| SGK    | SGK1   | 98  | 10000 |
| SgK110 | SgK110 | 100 | 10000 |
| SGK2   | SGK2   | 89  | 10000 |
| SGK3   | SGK3   | 70  | 10000 |
| SIK    | SIK1   | 96  | 10000 |
| SIK2   | SIK2   | 94  | 10000 |
| SLK    | SLK    | 92  | 10000 |
| SNARK  | NUAK2  | 91  | 10000 |
| SNRK   | SNRK   | 95  | 10000 |
| SRC    | SRC    | 59  | 10000 |
| SRMS   | SRMS   | 71  | 10000 |
| SRPK1  | SRPK1  | 92  | 10000 |
| SRPK2  | SRPK2  | 100 | 10000 |
| SRPK3  | SRPK3  | 97  | 10000 |
| STK16  | STK16  | 84  | 10000 |
| STK33  | STK33  | 95  | 10000 |
| STK35  | STK35  | 93  | 10000 |
| STK36  | STK36  | 98  | 10000 |
| STK39  | STK39  | 91  | 10000 |
| SYK    | SYK    | 88  | 10000 |
| TAK1   | MAP3K7 | 73  | 10000 |
| TAOK1  | TAOK1  | 80  | 10000 |
| TAOK2  | TAOK2  | 100 | 10000 |
| TAOK3  | TAOK3  | 95  | 10000 |
| TBK1   | TBK1   | 75  | 10000 |
| TEC    | TEC    | 97  | 10000 |
| TESK1  | TESK1  | 90  | 10000 |
| TGFBR1 | TGFBR1 | 97  | 10000 |
| TGFBR2 | TGFBR2 | 80  | 10000 |
| TIE1   | TIE1   | 82  | 10000 |
| TIE2   | TEK    | 100 | 10000 |
| TLK1   | TLK1   | 90  | 10000 |
| TLK2   | TLK2   | 100 | 10000 |
| TNIK   | TNIK   | 100 | 10000 |
| TNK1   | TNK1   | 63  | 10000 |
| TNK2   | TNK2   | 100 | 10000 |
| TNNI3K | TNNI3K | 75  | 10000 |
| TRKA   | NTRK1  | 45  | 10000 |
| TRKB   | NTRK2  | 87  | 10000 |
| TRKC   | NTRK3  | 100 | 10000 |

|                               |         |     |       |
|-------------------------------|---------|-----|-------|
| TRPM6                         | TRPM6   | 77  | 10000 |
| TSSK1B                        | TSSK1B  | 98  | 10000 |
| TSSK3                         | TSSK3   | 100 | 10000 |
| TTK                           | TTK     | 75  | 10000 |
| TXK                           | TXK     | 89  | 10000 |
| TYK2(JH1 domain-catalytic)    | TYK2    | 91  | 10000 |
| TYK2(JH2 domain-pseudokinase) | TYK2    | 99  | 10000 |
| TYRO3                         | TYRO3   | 100 | 10000 |
| ULK1                          | ULK1    | 100 | 10000 |
| ULK2                          | ULK2    | 95  | 10000 |
| ULK3                          | ULK3    | 83  | 10000 |
| VEGFR2                        | KDR     | 93  | 10000 |
| VPS34                         | PIK3C3  | 12  | 10000 |
| VRK2                          | VRK2    | 94  | 10000 |
| WEE1                          | WEE1    | 80  | 10000 |
| WEE2                          | WEE2    | 81  | 10000 |
| WNK1                          | WNK1    | 100 | 10000 |
| WNK2                          | WNK2    | 99  | 10000 |
| WNK3                          | WNK3    | 100 | 10000 |
| WNK4                          | WNK4    | 100 | 10000 |
| YANK1                         | STK32A  | 99  | 10000 |
| YANK2                         | STK32B  | 95  | 10000 |
| YANK3                         | STK32C  | 95  | 10000 |
| YES                           | YES1    | 100 | 10000 |
| YSK1                          | STK25   | 100 | 10000 |
| YSK4                          | MAP3K19 | 80  | 10000 |
| ZAK                           | ZAK     | 93  | 10000 |
| ZAP70                         | ZAP70   | 100 | 10000 |
